# Supplementary material for: Hydroxyl deficiency-induced mixed linkages in covalent pyrimidine frameworks towards enhancing stability during H 2 O 2 photosynthesis
Source: Royal Society of Chemistry journal article supplement (doi:10.1039/d5qi00919g), 2025-01-01
Supplement: d5qi00919g1.pdf [file d5qi00919g1.pdf]

## Supporting information files

### **Hydroxyl Deficiency-Induced Mixed Linkages in Covalent Pyrimidine Frameworks towards Enhancing Stability during H<sub>2</sub>O<sub>2</sub> Photosynthesis**

Yongxia Li<sup>a\*</sup> Jingyang Zhang,<sup>b</sup> Xingyu Zhang,<sup>a</sup> Wenbo Li<sup>a</sup> and Aiguo Kong<sup>b\*</sup>

<sup>a</sup> Department of Chemistry, Xinzhou Normal University, Xinzhou 034000, China

<sup>b</sup> School of Chemistry and Molecular Engineering, East China Normal University, Shanghai 200241, P. R. China

\*Corresponding authors. E-mail: agkong@chem.ecnu.edu.cn; yxli@xztu.edu.cn

### **In-situ infrared Fourier transform spectroscopy**

The O<sub>2</sub> atmosphere containing with H<sub>2</sub>O vapor was firstly bubbling into in-situ infrared cell with COFs, and the FT-IR signals in the dark were collected at 5, 15 and 30 min for observing the adsorption of O<sub>2</sub> and H<sub>2</sub>O on COFs. After that, the visible light was turned on, and the FT-IR spectra during photocatalysis were recorded under the presence of H<sub>2</sub>O and O<sub>2</sub> at given times.

### **Isotope labelling experiments**

2 mg of catalysts and 0.5 mL of H<sub>2</sub><sup>18</sup>O (97%) were put in a sealed quartz vial (5 mL). Then, the suspension was obtained by ultrasonication. Pure N<sub>2</sub> was bubbled into the suspension for 30 min in the dark. After 2 h irradiation, the gas products in the headspace of the reaction vessel were collected and analyzed by GC-MS (GCMS-QP2010 SE, SHIMADZU).

### **The apparent quantum yield (AQY) measurements.**

The AQY of H<sub>2</sub>O<sub>2</sub> photosynthesis in the similar conditions with 50 mg catalyst was tested under 400 nm band-pass filter by the following equation:

$$AQY = \frac{2 \times n_{H_2O_2} \times N_A \times \frac{h \cdot c}{\lambda}}{P_{incident} \times \Delta t}$$

Where  $N_A = 6.02 \times 10^{23}$ ,  $h = 6.626 \times 10^{-34}$  J s,  $c = 3 \times 10^8$  m s<sup>-1</sup>, The light intensity was determined with a radiometer (Perfect Light, PL-MW2000).

### **Theoretical calculations.**

The Vienna Ab Initio Package (VASP) was employed to perform all the density functional theory (DFT) calculations within the generalized gradient approximation (GGA) using the Perdew, Burke, and Enzerhof (PBE) formulation.<sup>[1-3]</sup> The projected augmented wave (PAW) potentials were applied to describe the ionic cores and take valence electrons into account using a plane wave basis set with a kinetic energy cutoff

of 450 eV.<sup>[4,5]</sup> Partial occupancies of the Kohn–Sham orbitals were allowed using the Gaussian smearing method and a width of 0.05 eV. The electronic energy was considered self-consistent when the energy change was smaller than  $10^{-5}$  eV. A geometry optimization was considered convergent when the force change was smaller than 0.05 eV/Å. Grimme’s DFT-D3 methodology was used to describe the dispersion interactions.<sup>[6]</sup> The vacuum spacing perpendicular to the plane of the structure is 20 Å. The Brillouin zone integral utilized the surfaces structures of  $1\times 1\times 1$  monkhorst pack K-point sampling. Finally, the adsorption energies ( $E_{\text{ads}}$ ) were calculated as  $E_{\text{ads}} = E_{\text{ads/sub}} - E_{\text{ads}} - E_{\text{sub}}$ , where  $E_{\text{ad/sub}}$ ,  $E_{\text{ad}}$ , and  $E_{\text{sub}}$  are the total energies of the optimized adsorbate/substrate system, the adsorbate in the structure, and the clean substrate, respectively.

The free energy was calculated using the equation:

$$G = E_{\text{ads}} + \text{ZPE} - TS$$

where  $G$ ,  $E_{\text{ads}}$ ,  $\text{ZPE}$  and  $TS$  are the free energy, total energy from DFT calculations, zero point energy and entropic contributions, respectively.

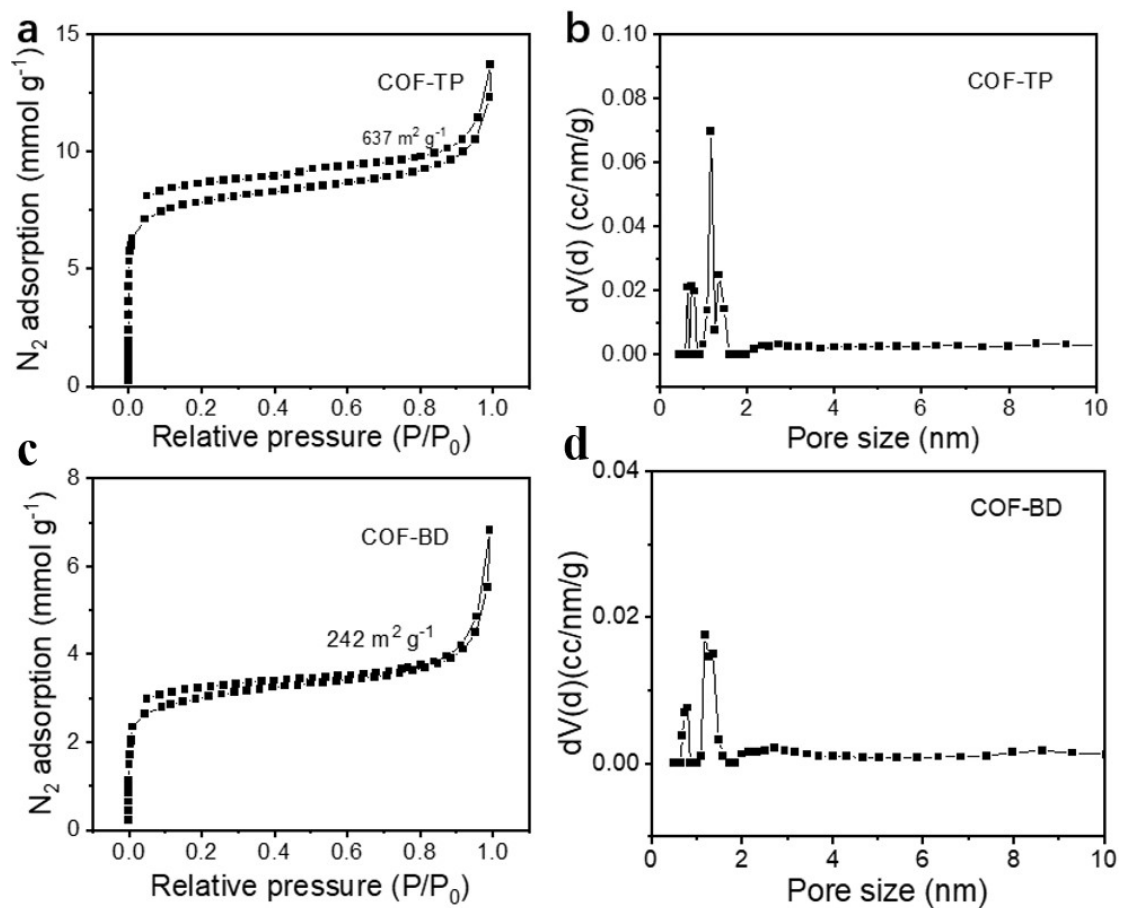

**Figure S1** (a and b) The N<sub>2</sub> sorption isotherm (a) and the pore size distribution curve based on NLDFT model (b) for COF-TP. (c and d) The N<sub>2</sub> sorption isotherm (c) and the pore size distribution curve based on NLDFT model (d) for COF-BD.

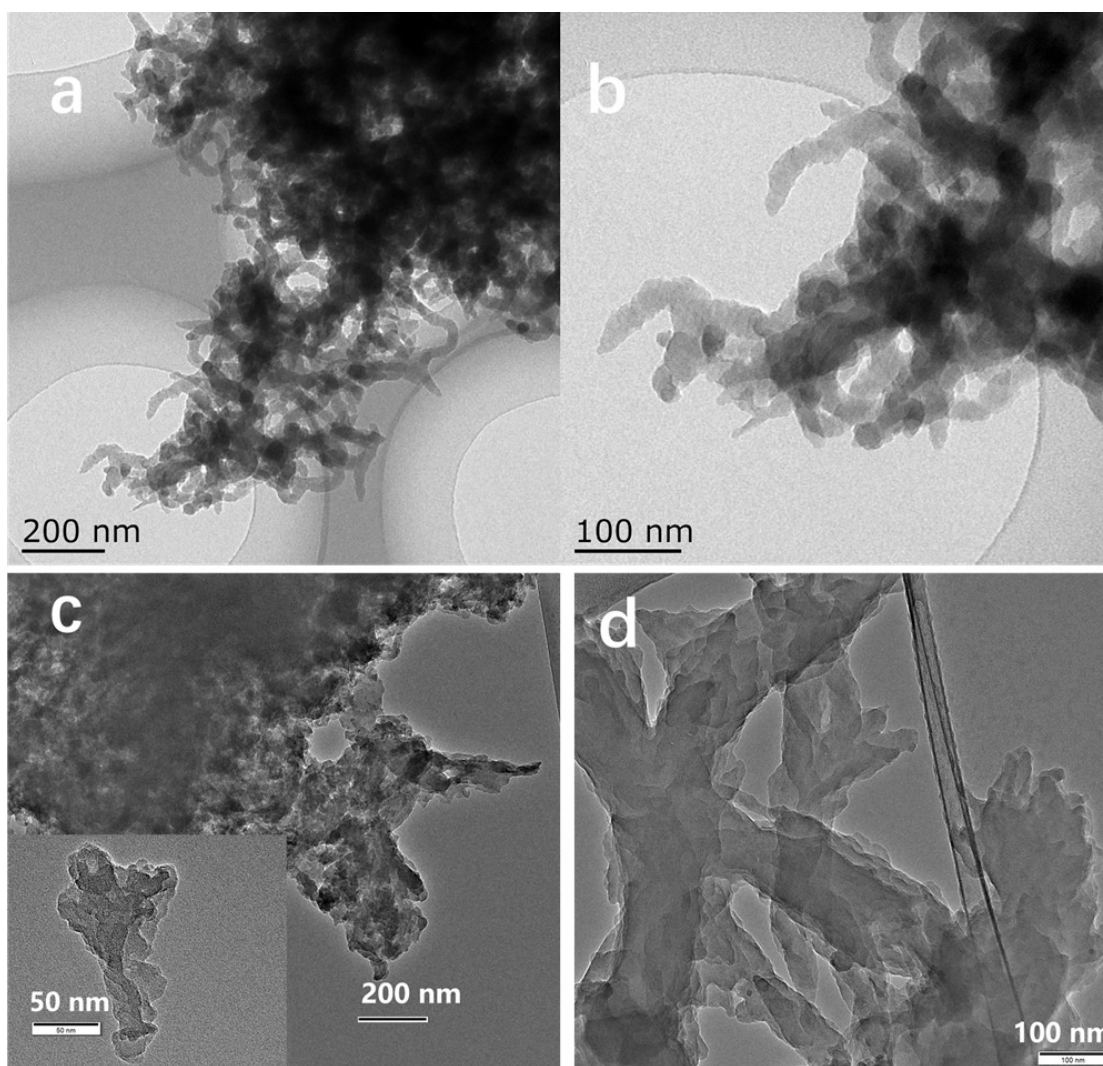

**Figure S2** TEM images of COF-TP (a and b) and the corresponding TEM images of the residual COF-TP after irradiation (c and d)

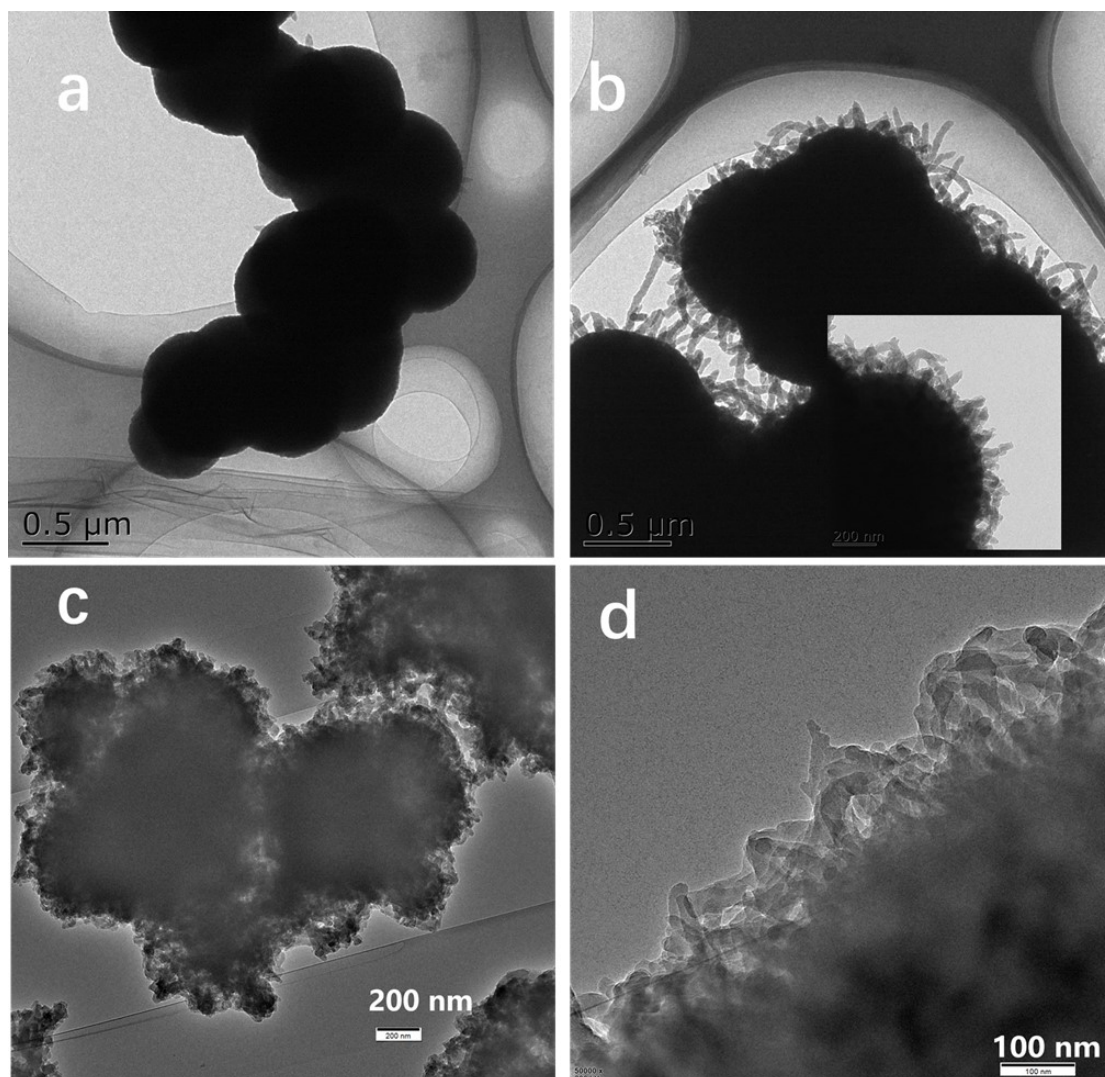

**Figure S3** TEM images of COF-BD (a and b) and the corresponding TEM images of the collected COF-BD samples after irradiation (c and d)

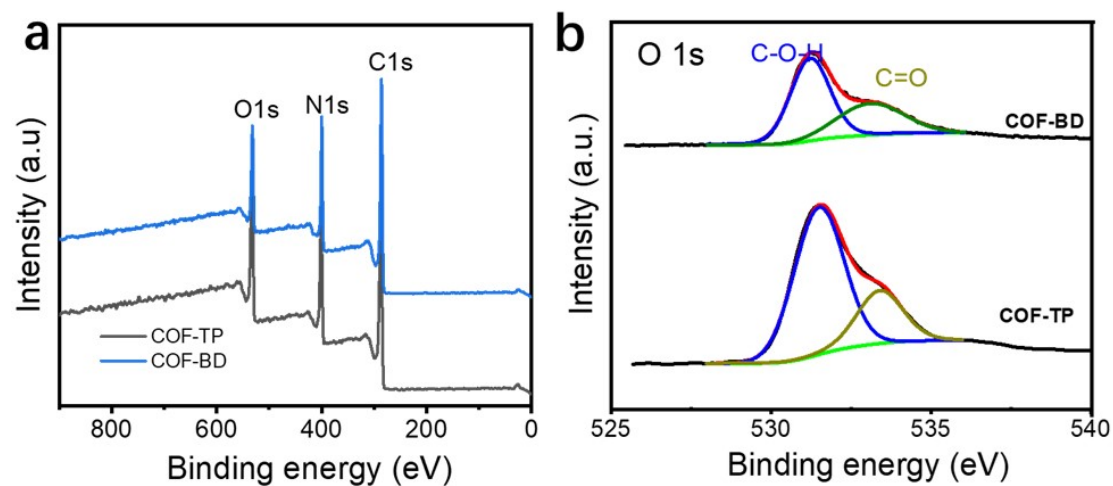

**Figure S4** (a) XPS survey spectra of COF-TP and COF-BD. (b) High-resolution O1s XPS spectra of COF-TP and COF-BD

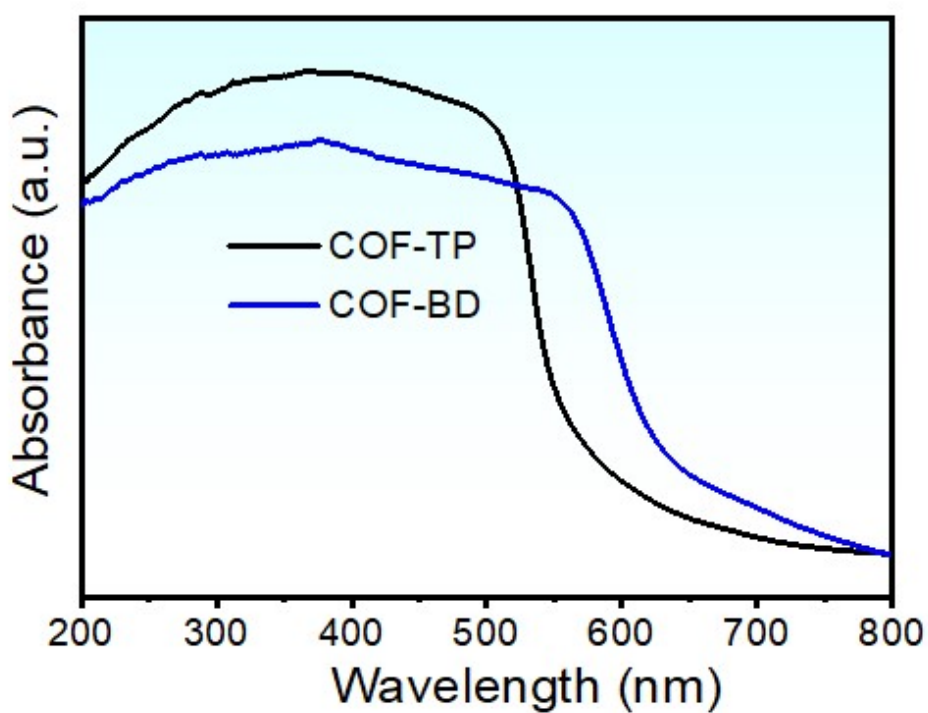

**Figure S5** The UV-vis DRS curves for COF-TP and COF-BD

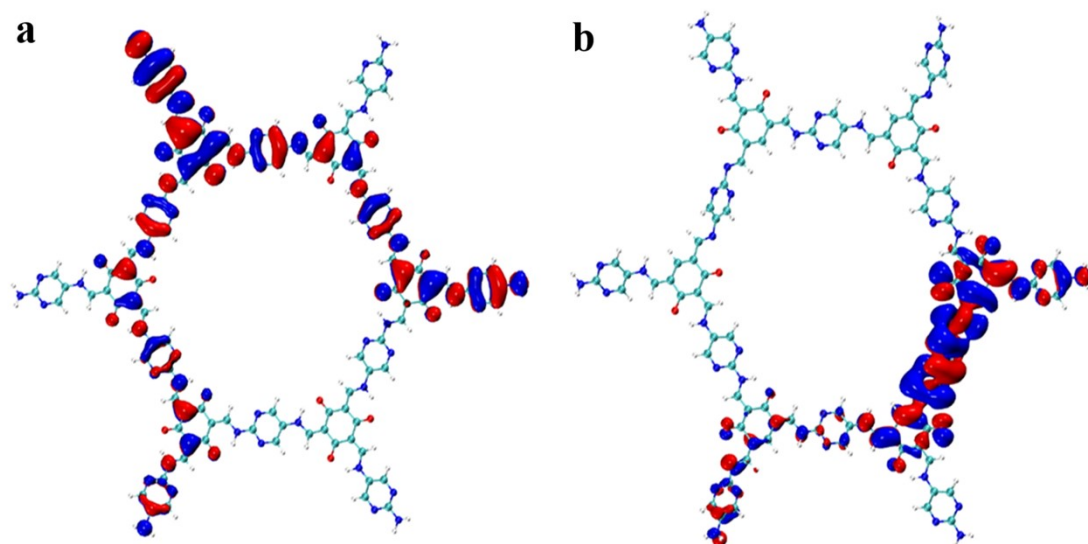

**Figure S6** The calculated LUMO orbit distributions of COF-TP (a) and COF-BD (b)

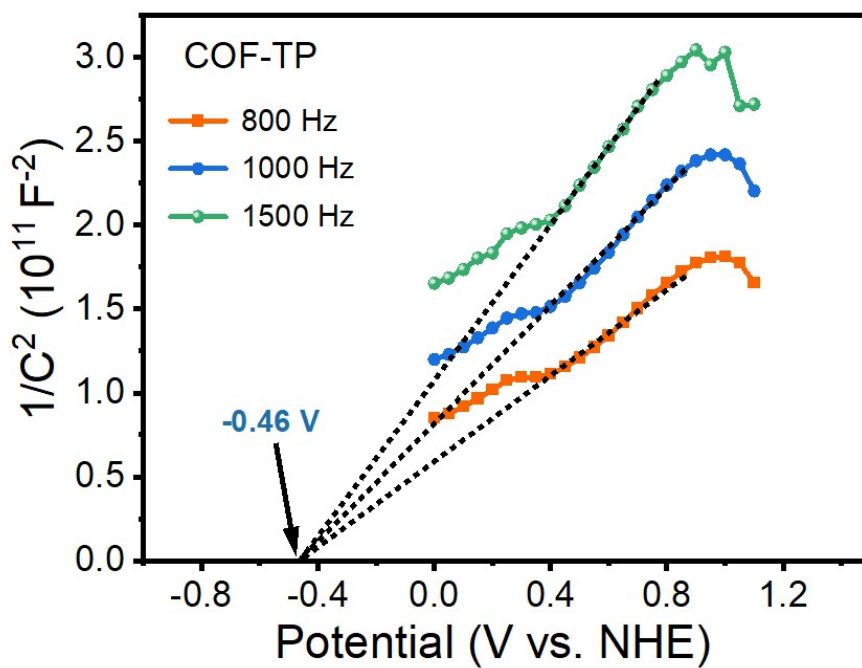

**Figure S7** The Mott-Schottly plots of COF-TP in 0.1 M  $\text{Na}_2\text{SO}_4$  electrolyte.



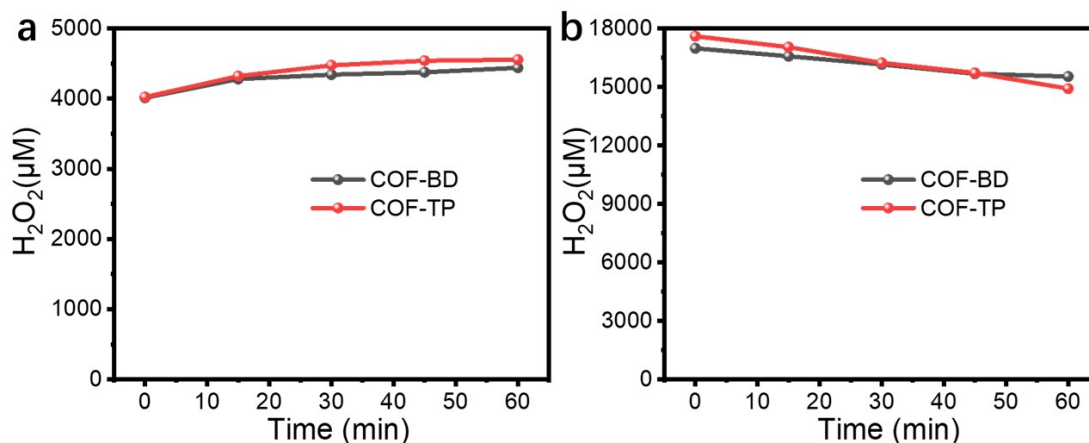

**Figure S8** (a and b)  $H_2O_2$  decomposition curves on COF-BD and COF-TP. Reaction conditions: 5 mg catalyst, 40 mL  $H_2O_2$  solution of about 4000  $\mu M$  (a) or about 17000  $\mu M$  (b), visible light  $> 420$  nm and room temperature.

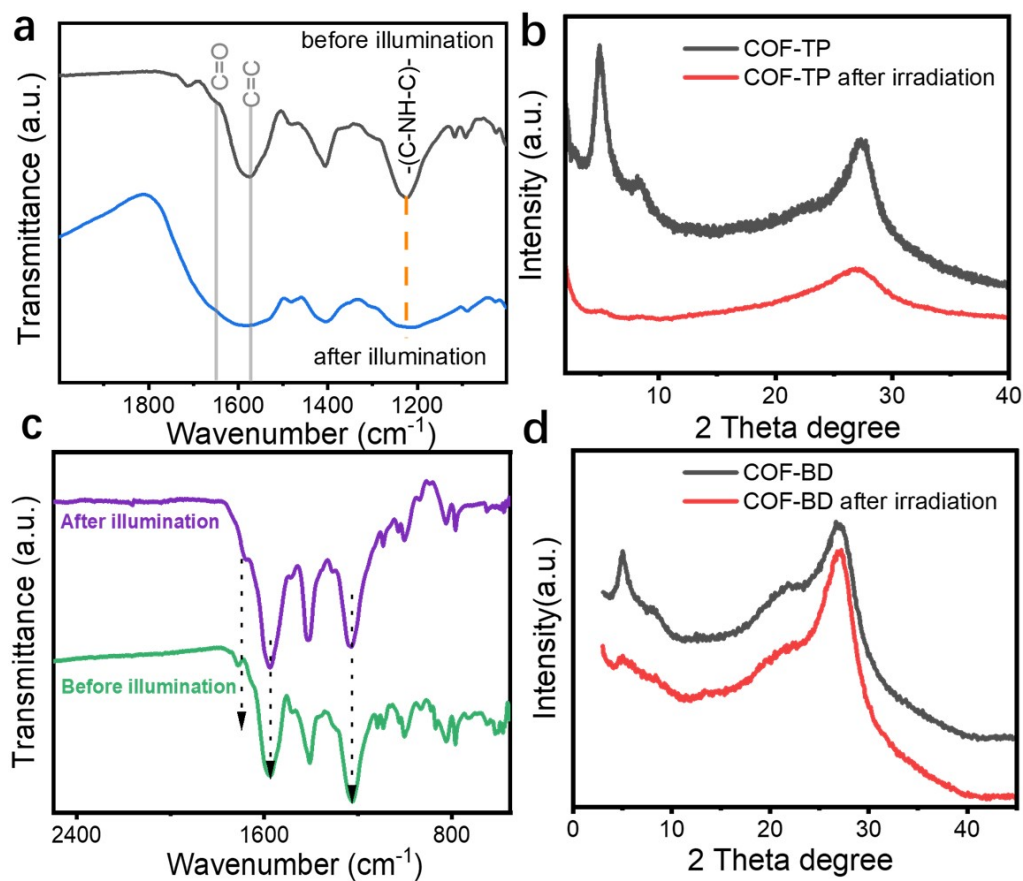

**Figure S9** FT-IR spectra (a and c) and PXRD patterns (b and d) of COF-TP (a and b) and COF-BD (c and d) before and after undergoing irradiation

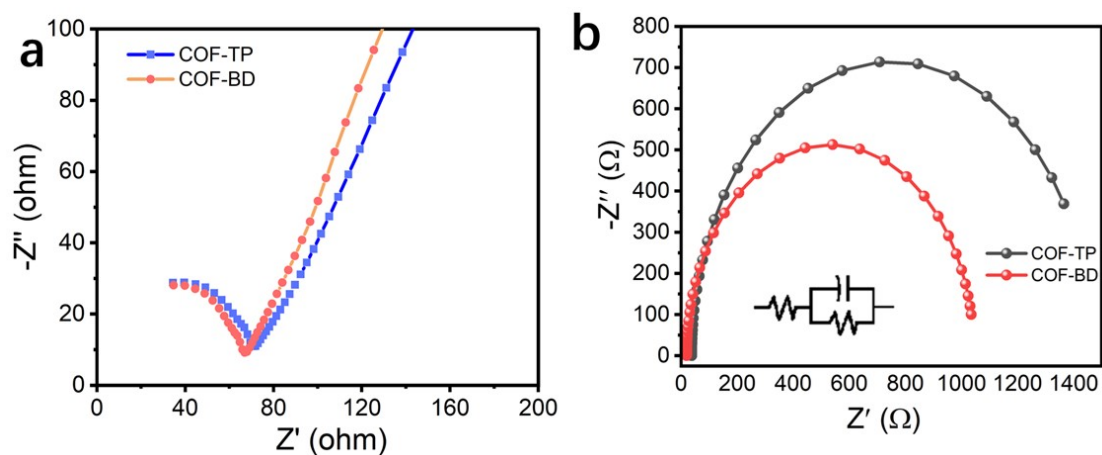

**Figure S10** The original EIS spectra of COF-TP and COF-BD and the corresponding simulated EIS curves according to the inset equivalent circuit.

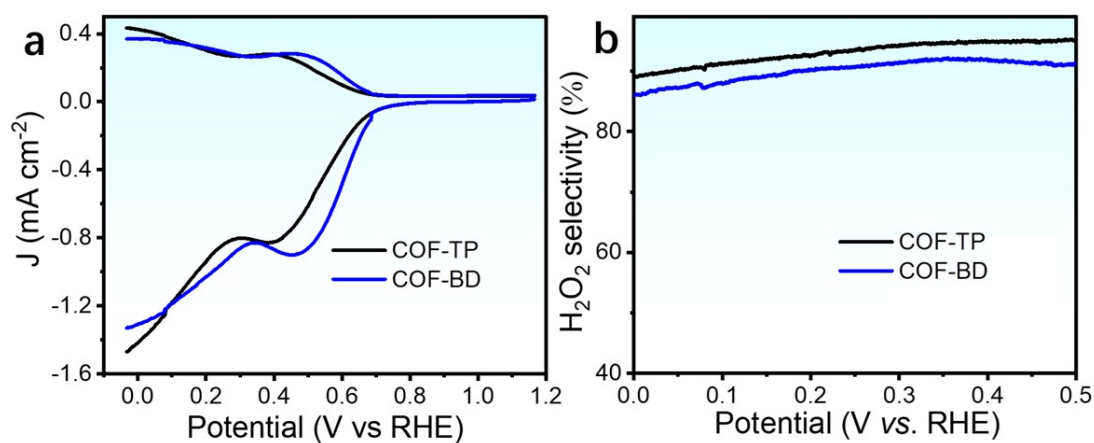

**Figure S11** The ORR LSV curves (a) and  $\text{H}_2\text{O}_2$  selectivity (b) in 0.1 M PBS for COF-TP and COF-BD

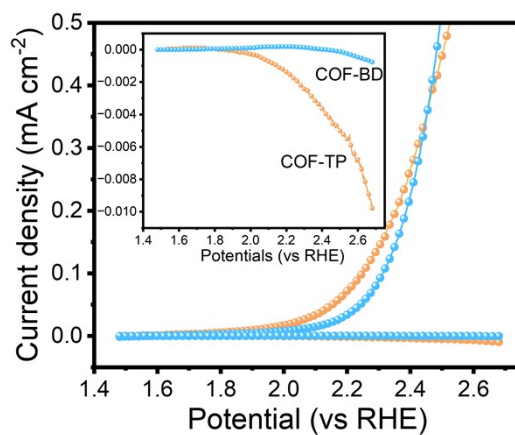

**Figure S12** The WOR LSV curves on the RRDE electrode in 0.1 M  $\text{Na}_2\text{SO}_4$ . Inset is the enlarged current density on ring electrode.

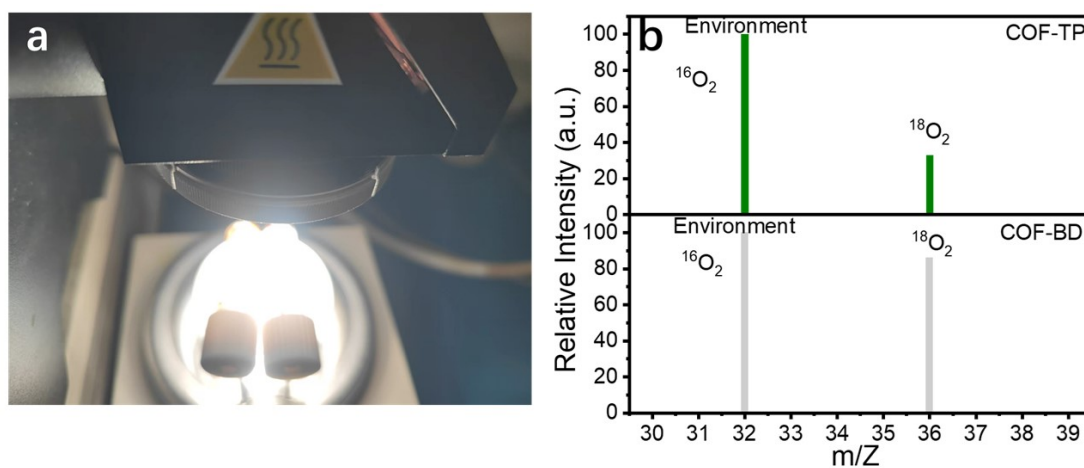

**Figure S13**  $^{18}\text{O}$  isotope labeling experiment conducted in  $\text{N}_2$ -saturated  $\text{H}_2^{18}\text{O}$  solution and the corresponding GC-MS results

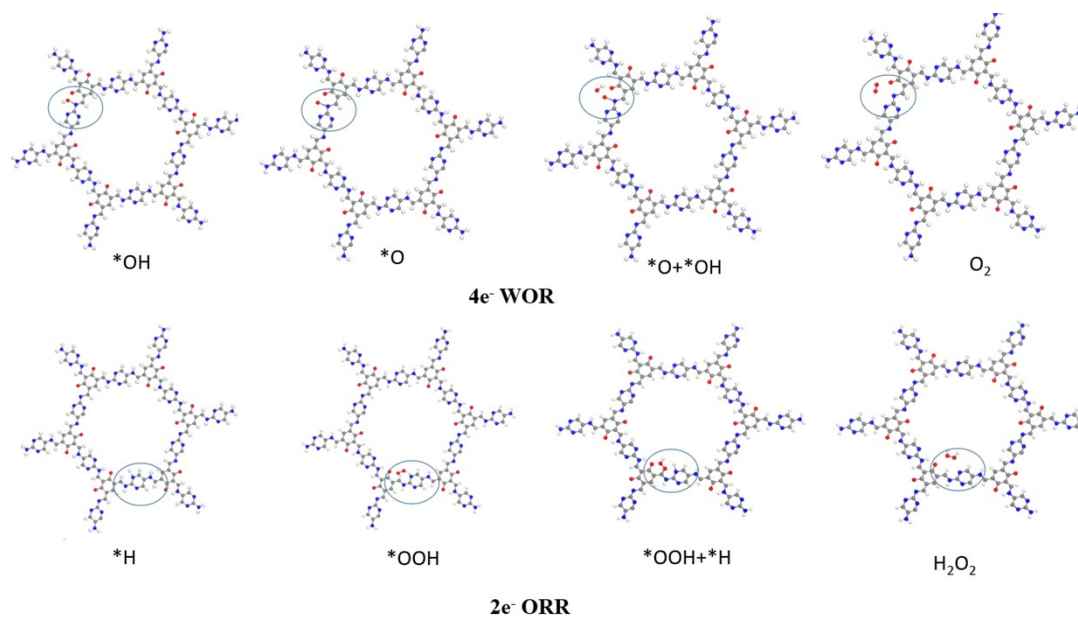

**Figure S14** Optimized structure snapshots of key reaction intermediates in  $2\text{e}^-$  ORR and  $4\text{e}^-$  WOR on COF-BD.

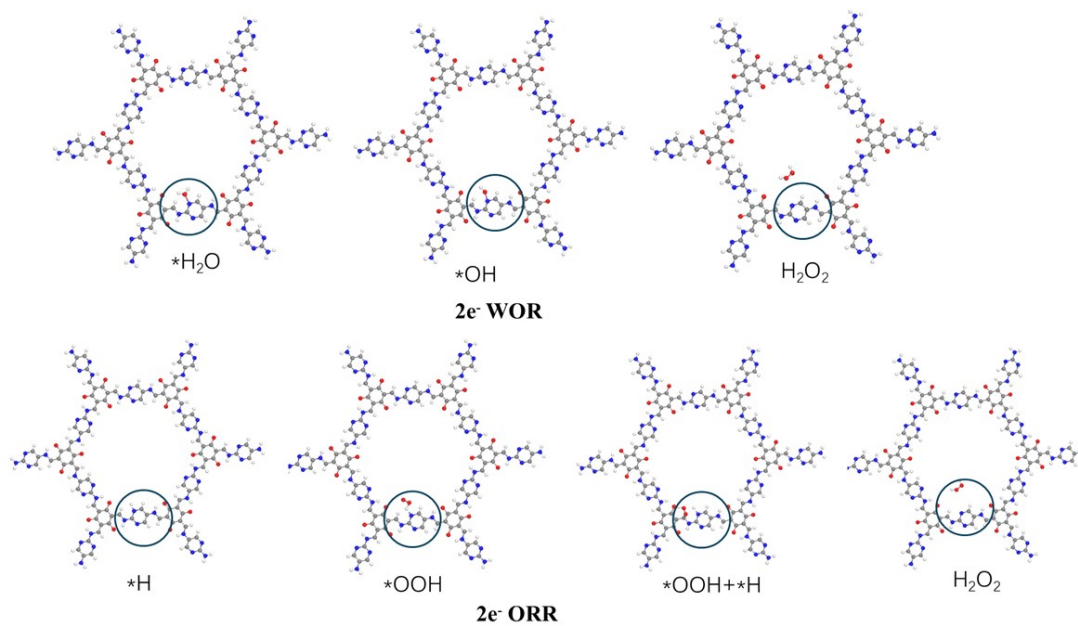

**Figure S15** Optimized structure snapshots of key reaction intermediates in 2e<sup>-</sup> ORR and 2e<sup>-</sup> WOR on COF-TP.

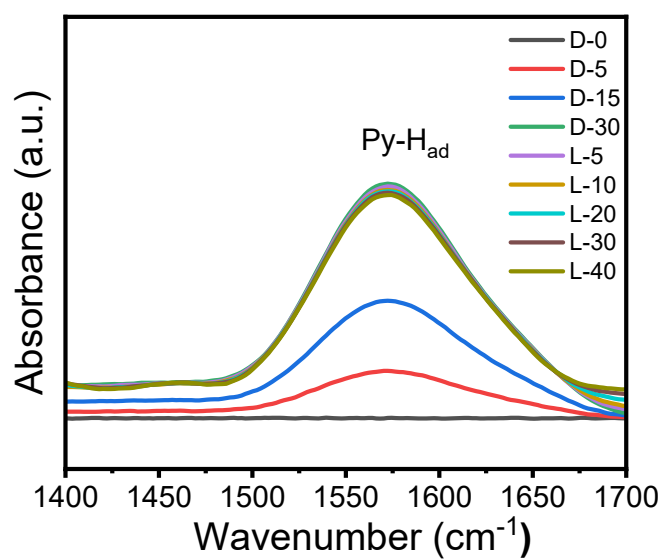

**Figure S16** In-situ DRIFTS of probable Py-H<sub>ad</sub> adsorption signals on COF-BD

**Table S1** The comparison results of COF-BD, COF-TP and other reported results

| Photocatalysts  | H <sub>2</sub> O <sub>2</sub> production rates | Reaction pathways                       | condition                                      | References                 |
|-----------------|------------------------------------------------|-----------------------------------------|------------------------------------------------|----------------------------|
| COF-NUST-16     | 1081 $\mu\text{mol g}^{-1} \text{h}^{-1}$      | 2e <sup>-</sup> ORR/2e <sup>-</sup> WOR | O <sub>2</sub> , $\lambda \geq 420 \text{ nm}$ | 10.1016/j.cej.2022.140121  |
| CHF-DPDA        | about 600 $\mu\text{mol g}^{-1} \text{h}^{-1}$ | 2e <sup>-</sup> ORR                     | O <sub>2</sub> , $\lambda \geq 420 \text{ nm}$ | 10.1002/adma.201904433     |
| APFac           | 1123 $\mu\text{mol g}^{-1} \text{h}^{-1}$      | 2e <sup>-</sup> ORR                     | O <sub>2</sub> , $\lambda \geq 420 \text{ nm}$ | 10.1002/anie.202302829     |
| TpAQ-COF-12     | 420 $\mu\text{mol g}^{-1} \text{h}^{-1}$       | 2e <sup>-</sup> ORR                     | O <sub>2</sub> , $\lambda > 420 \text{ nm}$    | 10.1016/j.cej.2023.143085  |
| DE7-M           | 1100 $\mu\text{mol g}^{-1} \text{h}^{-1}$      | 2e <sup>-</sup> ORR                     | Air, Sunlight                                  | 10.1021/jacs.1c09979       |
| DE7-M           | 2216 $\mu\text{mol g}^{-1} \text{h}^{-1}$      | 2e <sup>-</sup> ORR                     | O <sub>2</sub> , $\lambda > 420 \text{ nm}$    | 10.1021/jacs.1c09979       |
| BTT-H3          | 1588 $\mu\text{mol g}^{-1} \text{h}^{-1}$      | 2e <sup>-</sup> ORR/4e <sup>-</sup> WOR | Air, $\lambda = 467 \text{ nm}$                | 10.1038/s41467-025-55894-y |
| BTT-H2          | 1359 $\mu\text{mol g}^{-1} \text{h}^{-1}$      | 2e <sup>-</sup> ORR/4e <sup>-</sup> WOR | Air, $\lambda = 467 \text{ nm}$                | 10.1038/s41467-025-55894-y |
| BTT-H1          | 1096 $\mu\text{mol g}^{-1} \text{h}^{-1}$      | 2e <sup>-</sup> ORR/4e <sup>-</sup> WOR | Air, $\lambda = 467 \text{ nm}$                | 10.1038/s41467-025-55894-y |
| BTT-DAB         | 854 $\mu\text{mol g}^{-1} \text{h}^{-1}$       | 2e <sup>-</sup> ORR/4e <sup>-</sup> WOR | Air, $\lambda = 467 \text{ nm}$                | 10.1038/s41467-025-55894-y |
| Ald-TTB-TTA     | 3169 $\mu\text{mol g}^{-1} \text{h}^{-1}$      | 2e <sup>-</sup> ORR                     | O <sub>2</sub> , $\lambda > 420 \text{ nm}$    | 10.1021/acsami.4c14391     |
| Por-COF-cya     | 2209 $\mu\text{mol g}^{-1} \text{h}^{-1}$      | 2e <sup>-</sup> ORR                     | O <sub>2</sub> , $\lambda > 420 \text{ nm}$    | 10.1002/anie.202423205     |
| TTF@Por-COF-cya | 6994 $\mu\text{mol g}^{-1} \text{h}^{-1}$      | 2e <sup>-</sup> ORR                     | O <sub>2</sub> , $\lambda > 420 \text{ nm}$    | 10.1002/anie.202423205     |

|               |                                                                                    |                                              |                                                                |                            |
|---------------|------------------------------------------------------------------------------------|----------------------------------------------|----------------------------------------------------------------|----------------------------|
| TACOF-1-COOH  | 3542 $\mu\text{mol g}^{-1} \text{h}^{-1}$                                          | 2e <sup>-</sup> ORR/4e <sup>-</sup> WOR      | O <sub>2</sub> , $\lambda > 420 \text{ nm}$                    | 10.1002/anie.202408802     |
| COF-N32       | 605 $\mu\text{mol g}^{-1} \text{h}^{-1}$                                           | 2e <sup>-</sup> ORR/2e <sup>-</sup> WOR      | O <sub>2</sub> , $\lambda \geq 420 \text{ nm}$                 | 10.1038/s41467-023-40007-4 |
| CTF-BDDBN     | 97.2 $\mu\text{mol g}^{-1} \text{h}^{-1}$                                          | 2e <sup>-</sup> ORR/2e <sup>-</sup> WOR      | O <sub>2</sub> , $\lambda > 420 \text{ nm}$                    | 10.1002/adma.201904433     |
| <b>COF-BD</b> | <b>5312 <math>\mu\text{mol g}^{-1} \text{h}^{-1}</math></b>                        | <b>2e<sup>-</sup> ORR/4e<sup>-</sup> WOR</b> | <b>O<sub>2</sub>, <math>\lambda \geq 420 \text{ nm}</math></b> | <b>This work</b>           |
| <b>COF-TP</b> | <b>14480(10 minutes)/6104 (1h) <math>\mu\text{mol g}^{-1} \text{h}^{-1}</math></b> | <b>2e<sup>-</sup> ORR/2e<sup>-</sup> WOR</b> | <b>O<sub>2</sub>, <math>\lambda \geq 420 \text{ nm}</math></b> | <b>This work</b>           |

---

## References

- [1] Kresse G. and Furthmüller J, Efficient Iterative Schemes for Ab Initio Total-Energy Calculations Using a Plane-Wave Basis Set, *Phys. Rev. B*, 1996, **54**, 11169–11186.
- [2] Perdew J. P., Burke, K. and Ernzerhof M., Generalized Gradient Approximation Made Simple, *Phys. Rev. Lett.*, 1996, **77**, 3865–3868.
- [3] Kresse G. and Joubert D., From Ultrasoft Pseudopotentials to the Projector Augmented-Wave Method, *Phys. Rev. B*, 1999, **59**, 1758-1775.
- [4] Blöchl P. E., Projector Augmented-Wave Method, *Phys. Rev. B*, 1994, **50**, 17953–17979.
- [5] Grimme S., Antony J., Ehrlich S. and Krieg H., A consistent and accurate ab initio parametrization of density functional dispersion correction (DFT-D) for the 94 elements H-Pu, *J. Chem. Phys.*, 2010, **132**, 154104.
- [6] Henkelman G., Uberuaga B. P. and Jonsson H., A climbing image nudged elastic band method for finding saddle points and minimum energy paths, *J. Chem. Phys.*, 2000, **113**, 9901-9904.
